# Supplementary material for: Green Synthesis of Mesquite-Gum-Stabilized Gold Nanoparticles for Biomedical Applications: Physicochemical Properties and Biocompatibility Assessment
Source: MDPI journal article supplement (doi:10.3390/polym15173533), 2023-08-24
Supplement: s1 [file s1]

# Green Synthesis of Mesquite-Gum-Stabilized Gold Nanoparticles for Biomedical Applications: Physicochemical Properties and Biocompatibility Assessment

Ana M. Pinilla-Torres <sup>1,†</sup>, Celia N. Sanchez-Dominguez <sup>2,†</sup>, Karla Basilio-Bernabe <sup>1</sup>, Paola Y. Carrion-Garcia <sup>2</sup>, Jorge A. Roacho-Perez <sup>2</sup>, Elsa N. Garza-Treviño <sup>2</sup>, Hugo Gallardo-Blanco <sup>3,\*</sup> and Margarita Sanchez-Dominguez <sup>1,\*</sup>

<sup>1</sup> Grupo de Química Coloidal e Interfacial Aplicada a Nanomateriales y Formulaciones, Centro de Investigación en Materiales Avanzados, S.C. (CIMAV, S.C.), Unidad Monterrey, Apodaca 66628, Mexico; ana.pinilla@cimav.edu.mx (A.M.P.-T.); karlabasiliobernabe96@gmail.com (K.B.-B.)

<sup>2</sup> Departamento de Bioquímica y Medicina Molecular, Facultad de Medicina, Universidad Autónoma de Nuevo León, Monterrey 64460, Mexico; celia.sanchezdm@uanl.edu.mx (C.N.S.-D.); carriongarcia.paola@gmail.com (P.Y.C.-G.); alberto.roachoprz@uanl.edu.mx (J.A.R.-P.); elsa.garzatr@uanl.edu.mx (E.N.G.-T.)

<sup>3</sup> Departamento de Genética, Facultad de Medicina, Universidad Autónoma de Nuevo León, Monterrey 64460, Mexico

\* Correspondence: hugo.gallardobl@uanl.edu.mx (H.G.-B.); margarita.sanchez@cimav.edu.mx (M.S.-D.)

<sup>†</sup> These authors contributed equally to this work.

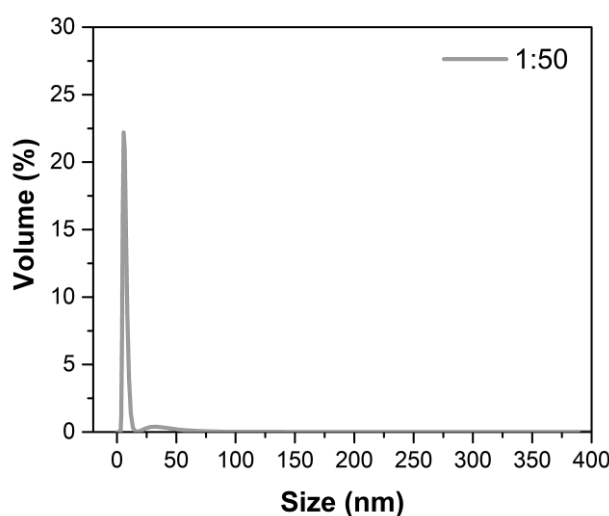

**Figure S1.** Size distribution of AuNPs@MG at 1:50 weight ratio ( $W_{MG}/W_{Au}$ ).

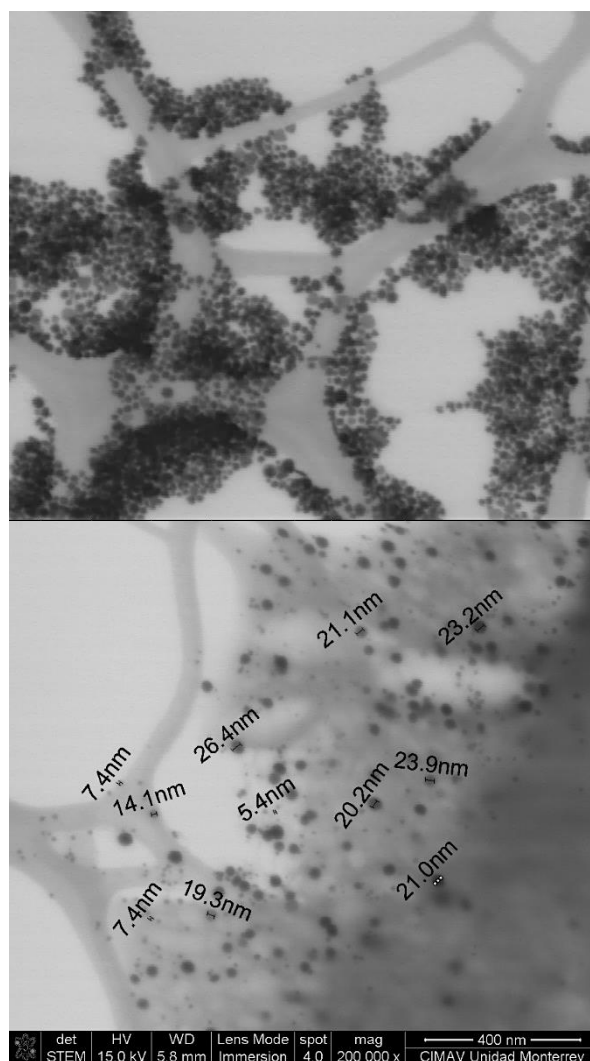

**Figure S2.** STEM Micrographs of AuNPs@MG obtained at a 1:15 weight ratio.

**Table S1.** Comparison of the synthesis of AuNPs using AG reported in the literature and the method reported here.

| Authors                  | Reducing and stabilizing agent                                                            | Reaction time | Temperature      | Shape/ Average particle size | Observations                                                                                                                                                                              | Reference        |
|--------------------------|-------------------------------------------------------------------------------------------|---------------|------------------|------------------------------|-------------------------------------------------------------------------------------------------------------------------------------------------------------------------------------------|------------------|
| Pinilla et al.           | Mesquite gum                                                                              | 180 min       | 70°C             | Globular NPs/18.3±7.3        | We do not use toxic reducing and stabilizing agents<br>Stable at physiological conditions (PBS)<br>Biocompatible.<br>Hemocompatible                                                       | <b>This work</b> |
| Ribeiro de Barros et al. | NaBH <sub>4</sub> (reducing agent)<br>Arabic gum (Stabilizing agent)                      | 60 min        | Room temperature | Spherical/ 5.4 nm            | It is necessary to leave the mixture overnight at 4°C to ensure complete hydration of the gum.<br>Hemocompatibility was not evaluated.<br>NaBH <sub>4</sub> was used and it is cytotoxic. | [1]              |
| Gamal-El-deen et al.     | P(CH <sub>2</sub> NHCOOH) <sub>3</sub> (Reducing agent)<br>Arabic gum (Stabilizing agent) | 10 min        | 80 °C            | Spherical/ 21 nm             | An additional chemical compound was used to reduce the gold.<br>Stability over time under physiological conditions was not evaluated<br>Hemocompatibility was not evaluated               | [2]              |
| Wu et al.                | Arabic gum                                                                                | 240 min       | 55°C             | Spherical/ 26.8nm            | Stability over time under physiological conditions was not evaluated.<br>Hemocompatibility was not evaluated                                                                              | [3]              |
| Iranpour et al.          | Ionic liquid<br>D-glucosammonium                                                          | 20 min        | 60 °C.           | Spherical/ 25 nm             | Ionic liquids are relatively high cost compared to other reducing agents.                                                                                                                 | [4]              |

|                             |                                                                                                          |        |                       |      |                                                                                                               |     |
|-----------------------------|----------------------------------------------------------------------------------------------------------|--------|-----------------------|------|---------------------------------------------------------------------------------------------------------------|-----|
|                             | formate<br>(Reducing agent)                                                                              |        |                       |      | Hemocompatibility<br>was not evaluated.                                                                       |     |
|                             | Arabic gum<br>(Stabilizing<br>agent)                                                                     |        |                       |      |                                                                                                               |     |
| <b>Gonçalves<br/>et al.</b> | NaBH <sub>4</sub><br>Ascorbic acid<br>(Reducing agents)<br>CTAB<br>Arabic gum<br>(Stabilizing<br>agents) | 360min | Room tem-<br>perature | Rods | CTAB and NaBH <sub>4</sub> are<br>cytotoxic<br>Long reaction time.<br>Hemocompatibility<br>was not evaluated. | [5] |

## References

1. Ribeiro, de Barros H, Cardoso, MB, Camargo de Oliveira, C, et al (2016) Stability of gum arabic-gold nanoparticles in physiological simulated pHs and their selective effect on cell lines. *RSC Adv* 6:9411–9420. <https://doi.org/10.1039/C5RA24858B>
2. Gamal-Eldeen AM, Moustafa D, El-Daly SM, et al (2016) Photothermal therapy mediated by gum Arabic-conjugated gold nanoparticles suppresses liver preneoplastic lesions in mice. *J Photochem Photobiol B* 163:47–56. <https://doi.org/10.1016/j.jphoto-biol.2016.08.009>
3. Wu C-C, Chen D-H (2010) Facile green synthesis of gold nanoparticles with gum arabic as a stabilizing agent and reducing agent. *Gold Bull* 43:234–240. <https://doi.org/10.1007/BF03214993>
4. Iranpour P, Ajamian M, Safavi A, et al (2018) Synthesis of highly stable and biocompatible gold nanoparticles for use as a new X-ray contrast agent. *J Mater Sci Mater Med* 29:48. <https://doi.org/10.1007/s10856-018-6053-5>
5. Gonçalves JP, da Cruz AF, Nunes ÁM, et al (2021) Biocompatible gum arabic-gold nanorod composite as an effective therapy for mistreated melanomas. *Int J Biol Macromol* 185:551–561. <https://doi.org/10.1016/j.ijbiomac.2021.06.172>
